# Supplementary material for: Systematic evaluation of the efficacy–effectiveness gap of systemic treatments in metastatic nonsmall cell lung cancer
Source: PubMed Central journal article supplement — Eur Respir J. 2018 Dec 20;52(6):1801100. doi: 10.1183/13993003.01100-2018 (PMC6306150; doi:10.1183/13993003.01100-2018), 2018-12-20
Supplement: ERJ-01100-2018_Supplement.pdf [file ERJ-01100-2018_Supplement.pdf]

## **Supplementary material “Systematic evaluation of the efficacy-effectiveness gap of systemic treatments in metastatic NSCLC”**

APPENDIX 1 Literature search

APPENDIX 2 Flow charts and reference tables clinical trial outcomes

STable 1. Clinical trial reference outcomes

SFigure 1. Flowchart cisplatin-pemetrexed

SFigure 2. Forest plot cisplatin-pemetrexed

STable 2. Clinical trial and real-world characteristics regimen cisplatin-pemetrexed

SFigure 3. Flowchart cisplatin-gemcitabine

SFigure 4. Forest plot cisplatin-gemcitabine

STable 3. Clinical trial and real-world characteristics regimen cisplatin-gemcitabine

SFigure 5. Flowchart carboplatin-pemetrexed

SFigure 6. Forest plot carboplatin-pemetrexed

STable 4. Clinical trial and real-world characteristics regimen carboplatin-pemetrexed

SFigure 7. Flowchart carboplatin-gemcitabine

SFigure 8. Forest plot carboplatin-gemcitabine

STable 5. Clinical trial and real-world characteristics regimen carboplatin-gemcitabine

SFigure 9. Flowchart carboplatin-paclitaxel-bevacizumab

SFigure 10. Forest plot carboplatin-paclitaxel-bevacizumab

STable 6. Clinical trial and real-world characteristics regimen carboplatin-paclitaxel-bevacizumab

SFigure 11. Flowchart carboplatin-docetaxel

SFigure 12. Forest plot carboplatin-docetaxel

STable 7. Clinical trial and real-world characteristics regimen carboplatin-docetaxel

SFigure 13. Flowchart gefitinib

SFigure 14. Forest plot gefitinib

STable 8. Clinical trial and real-world characteristics regimen gefitinib

SFigure 15. Flowchart erlotinib

SFigure 16. Forest plot erlotinib

STable 9. Clinical trial and real-world characteristics regimen erlotinib

SFigure 17. Forest plot with overview of clinical trials for reference outcome first-line chemotherapy

APPENDIX 3 Proxies for toxicity

STable 10. Dose reduction and switches to other systemic agents as proxies for toxicity

STable 11. Co-morbidities in patients with early discontinuation of systemic therapy

APPENDIX 4 List of included hospitals

## APPENDIX 1 Literature search

### PubMed; search on September 1, 2017

#### 1. Cisplatin pemetrexed

((cisplatin\*[tiab] OR "Cisplatin"[Mesh]) AND ("Pemetrexed"[Mesh] OR pemetrexed[tiab])) AND ("carcinoma, non-small-cell lung"[MeSH Terms] OR non small cell lung ca\*[tiab] OR NSCLC\*[tiab] OR lung adenocarcinom\*[tiab]) AND ("Neoplasm Metastasis"[Mesh] OR "secondary"[Subheading] OR stage IV[tiab] OR stage 4[tiab] OR stage IIIB[tiab] OR stage 3B[tiab] OR metastatic[tiab] OR metastas\*[tiab] OR advanced[tiab]) AND ("mortality" [Subheading] OR "Mortality"[Mesh] OR "Survival"[Mesh] OR "Survival Analysis"[Mesh] OR mortality[tiab] OR death\*[tiab] OR survival[tiab]) NOT ("animals"[mesh] NOT "humans"[mesh]) AND ("Clinical Trial, Phase III"[pt] OR phase III[ti] OR phase 3[ti] OR (("controlled clinical trial"[pt] OR controlled clinical trial[ti] OR randomized controlled trial[ti] OR randomized clinical trial[ti] OR randomised controlled trial[ti] OR randomised clinical trial[ti] OR rct[ti]) NOT ("Clinical Trial, Phase II"[pt] OR phase II[ti] OR phase 2[ti]))) AND english[la]

#### 2. Cisplatin gemcitabine

((cisplatin\*[tiab] OR "Cisplatin"[Mesh]) AND (gemcitabin\*[tiab] OR "gemcitabine" [Supplementary Concept])) AND ("carcinoma, non-small-cell lung"[MeSH Terms] OR non small cell lung ca\*[tiab] OR NSCLC\*[tiab] OR lung adenocarcinom\*[tiab]) AND ("Neoplasm Metastasis"[Mesh] OR "secondary"[Subheading] OR stage IV[tiab] OR stage 4[tiab] OR stage IIIB[tiab] OR stage 3B[tiab] OR metastatic[tiab] OR metastas\*[tiab] OR advanced[tiab]) AND ("mortality" [Subheading] OR "Mortality"[Mesh] OR "Survival"[Mesh] OR "Survival Analysis"[Mesh] OR mortality[tiab] OR death\*[tiab] OR survival[tiab]) NOT ("animals"[mesh] NOT "humans"[mesh]) AND ("Clinical Trial, Phase III"[pt] OR phase III[ti] OR phase 3[ti] OR (("controlled clinical trial"[pt] OR controlled clinical trial[ti] OR randomized controlled trial[ti] OR randomized clinical trial[ti] OR randomised controlled trial[ti] OR randomised clinical trial[ti] OR rct[ti]) NOT ("Clinical Trial, Phase II"[pt] OR phase II[ti] OR phase 2[ti]))) AND english[la]

#### 3. Carboplatin pemetrexed

((carboplatin\*[tiab] OR "Carboplatin"[Mesh]) AND ("Pemetrexed"[Mesh] OR pemetrexed[tiab])) AND ("carcinoma, non-small-cell lung"[MeSH Terms] OR non small cell lung ca\*[tiab] OR NSCLC\*[tiab] OR lung adenocarcinom\*[tiab]) AND ("Neoplasm Metastasis"[Mesh] OR "secondary"[Subheading] OR stage IV[tiab] OR stage 4[tiab] OR stage IIIB[tiab] OR stage 3B[tiab] OR metastatic[tiab] OR metastas\*[tiab] OR advanced[tiab]) AND ("mortality" [Subheading] OR "Mortality"[Mesh] OR "Survival"[Mesh] OR "Survival Analysis"[Mesh] OR mortality[tiab] OR death\*[tiab] OR survival[tiab]) NOT ("animals"[mesh] NOT "humans"[mesh]) AND ("Clinical Trial, Phase III"[pt] OR phase III[ti] OR phase 3[ti] OR (("controlled clinical trial"[pt] OR controlled clinical trial[ti] OR randomized controlled trial[ti] OR randomized clinical trial[ti] OR randomised controlled trial[ti] OR randomised clinical trial[ti] OR rct[ti]) NOT ("Clinical Trial, Phase II"[pt] OR phase II[ti] OR phase 2[ti]))) AND english[la]

#### 4. Carboplatin gemcitabine

((carboplatin\*[tiab] OR "Carboplatin"[Mesh]) AND (gemcitabin\*[tiab] OR "gemcitabine" [Supplementary Concept])) AND ("carcinoma, non-small-cell lung"[MeSH Terms] OR non small cell lung ca\*[tiab] OR NSCLC\*[tiab] OR lung adenocarcinom\*[tiab]) AND ("Neoplasm Metastasis"[Mesh] OR "secondary"[Subheading] OR stage IV[tiab] OR stage 4[tiab] OR stage IIIB[tiab] OR stage 3B[tiab] OR metastatic[tiab] OR metastas\*[tiab] OR advanced[tiab]) AND ("mortality" [Subheading] OR "Mortality"[Mesh] OR "Survival"[Mesh] OR "Survival Analysis"[Mesh] OR mortality[tiab] OR death\*[tiab] OR survival[tiab]) NOT ("animals"[mesh] NOT "humans"[mesh])

AND ("Clinical Trial, Phase III"[pt] OR phase III[ti] OR phase 3[ti] OR (("controlled clinical trial"[pt] OR controlled clinical trial[ti] OR randomized controlled trial[ti] OR randomized clinical trial[ti] OR randomised controlled trial[ti] OR randomised clinical trial[ti] OR rct[ti]) NOT ("Clinical Trial, Phase II"[pt] OR phase II[ti] OR phase 2[ti]))))  
AND english[la]

#### 5. *Bevacizumab carboplatin paclitaxel*

((bevacizumab[tiab] OR "Bevacizumab"[Mesh]) AND (carboplatin\*[tiab] OR "Carboplatin"[Mesh]) AND (paclitaxel[tiab] OR "Paclitaxel"[Mesh]))  
AND ("carcinoma, non-small-cell lung"[MeSH Terms] OR non small cell lung ca\*[tiab] OR NSCLC\*[tiab] OR lung adenocarcinom\*[tiab]) AND ("Neoplasm Metastasis"[Mesh] OR "secondary"[Subheading] OR stage IV[tiab] OR stage 4[tiab] OR stage IIIB[tiab] OR stage 3B[tiab] OR metastatic[tiab] OR metastas\*[tiab] OR advanced[tiab])  
AND ("mortality" [Subheading] OR "Mortality"[Mesh] OR "Survival"[Mesh] OR "Survival Analysis"[Mesh] OR mortality[tiab] OR death\*[tiab] OR survival[tiab])  
NOT ("animals"[mesh] NOT "humans"[mesh])  
AND ("Clinical Trial, Phase III"[pt] OR phase III[ti] OR phase 3[ti] OR (("controlled clinical trial"[pt] OR controlled clinical trial[ti] OR randomized controlled trial[ti] OR randomized clinical trial[ti] OR randomised controlled trial[ti] OR randomised clinical trial[ti] OR rct[ti]) NOT ("Clinical Trial, Phase II"[pt] OR phase II[ti] OR phase 2[ti]))))  
AND english[la]

#### 6. *Carboplatin docetaxel*

((carboplatin\*[tiab] OR "Carboplatin"[Mesh]) AND ("docetaxel"[Supplementary Concept] OR docetaxel[tiab]))  
AND ("carcinoma, non-small-cell lung"[MeSH Terms] OR non small cell lung ca\*[tiab] OR NSCLC\*[tiab] OR lung adenocarcinom\*[tiab]) AND ("Neoplasm Metastasis"[Mesh] OR "secondary"[Subheading] OR stage IV[tiab] OR stage 4[tiab] OR stage IIIB[tiab] OR stage 3B[tiab] OR metastatic[tiab] OR metastas\*[tiab] OR advanced[tiab])  
AND ("mortality" [Subheading] OR "Mortality"[Mesh] OR "Survival"[Mesh] OR "Survival Analysis"[Mesh] OR mortality[tiab] OR death\*[tiab] OR survival[tiab])  
NOT ("animals"[mesh] NOT "humans"[mesh])  
AND ("Clinical Trial, Phase III"[pt] OR phase III[ti] OR phase 3[ti] OR (("controlled clinical trial"[pt] OR controlled clinical trial[ti] OR randomized controlled trial[ti] OR randomized clinical trial[ti] OR randomised controlled trial[ti] OR randomised clinical trial[ti] OR rct[ti]) NOT ("Clinical Trial, Phase II"[pt] OR phase II[ti] OR phase 2[ti]))))  
AND english[la]

#### 7. *Gefitinib*

("gefitinib" [Supplementary Concept] OR gefitinib[tiab])  
AND ("carcinoma, non-small-cell lung"[MeSH Terms] OR non small cell lung ca\*[tiab] OR NSCLC\*[tiab] OR lung adenocarcinom\*[tiab]) AND ("Neoplasm Metastasis"[Mesh] OR "secondary"[Subheading] OR stage IV[tiab] OR stage 4[tiab] OR stage IIIB[tiab] OR stage 3B[tiab] OR metastatic[tiab] OR metastas\*[tiab] OR advanced[tiab])  
AND ("mortality" [Subheading] OR "Mortality"[Mesh] OR "Survival"[Mesh] OR "Survival Analysis"[Mesh] OR mortality[tiab] OR death\*[tiab] OR survival[tiab])  
NOT ("animals"[mesh] NOT "humans"[mesh])  
AND ("Clinical Trial, Phase III"[pt] OR phase III[ti] OR phase 3[ti] OR (("controlled clinical trial"[pt] OR controlled clinical trial[ti] OR randomized controlled trial[ti] OR randomized clinical trial[ti] OR randomised controlled trial[ti] OR randomised clinical trial[ti] OR rct[ti]) NOT ("Clinical Trial, Phase II"[pt] OR phase II[ti] OR phase 2[ti]))))  
AND english[la]

#### 8. *Erlotinib*

("Erlotinib Hydrochloride"[Mesh] OR erlotinib[tiab])  
AND ("carcinoma, non-small-cell lung"[MeSH Terms] OR non small cell lung ca\*[tiab] OR NSCLC\*[tiab] OR lung adenocarcinom\*[tiab]) AND ("Neoplasm Metastasis"[Mesh] OR "secondary"[Subheading] OR stage IV[tiab] OR stage 4[tiab] OR stage IIIB[tiab] OR stage 3B[tiab] OR metastatic[tiab] OR metastas\*[tiab] OR advanced[tiab])

AND ("mortality" [Subheading] OR "Mortality"[Mesh] OR "Survival"[Mesh] OR "Survival Analysis"[Mesh] OR mortality[tiab] OR death\*[tiab] OR survival[tiab])  
NOT ("animals"[mesh] NOT "humans"[mesh])  
AND ("Clinical Trial, Phase III"[pt] OR phase III[ti] OR phase 3[ti] OR ("controlled clinical trial"[pt] OR controlled clinical trial[ti] OR randomized controlled trial[ti] OR randomized clinical trial[ti] OR randomised controlled trial[ti] OR randomised clinical trial[ti] OR rct[ti]) NOT ("Clinical Trial, Phase II"[pt] OR phase II[ti] OR phase 2[ti]))  
AND english[la]

## Embase via Embase.com; search on September 1, 2017

### 1. *Cisplatin pemetrexed*

((cisplatin/exp OR cisplatin\*:ab,ti) AND ('pemetrexed'/exp OR pemetrexed:ab,ti) AND ('non small cell lung cancer'/exp OR 'non small cell lung carcinoma':ab,ti OR 'non small cell lung cancer':ab,ti OR NSCLC\*:ab,ti OR 'lung adenocarcinoma':ab,ti) AND ('metastasis'/exp OR 'stage IV':ab,ti OR 'stage 4':ab,ti OR 'stage IIIB':ab,ti OR 'stage 3B':ab,ti OR metastatic:ab,ti OR metastas\*:ab,ti OR advanced:ab,ti) AND ('mortality'/exp OR 'survival'/exp OR mortality:ab,ti OR death\*:ab,ti OR survival:ab,ti) AND ('phase 3 clinical trial'/exp OR 'phase III':ti OR 'phase 3':ti OR 'controlled clinical trial'/exp OR 'controlled clinical trial':ti OR 'randomized controlled trial':ti OR 'randomized clinical trial':ti OR 'randomised controlled trial':ti OR 'randomised clinical trial':ti OR rct:ti NOT ('phase 2 clinical trial'/exp OR 'phase II':ti OR 'phase 2':ti)) AND [english]/lim NOT 'conference abstract'/it

### 2. *Cisplatin gemcitabine*

((cisplatin/exp OR cisplatin\*:ab,ti) AND ('gemcitabine'/exp OR gemcitabin\*:ab,ti) AND ('non small cell lung cancer'/exp OR 'non small cell lung carcinoma':ab,ti OR 'non small cell lung cancer':ab,ti OR NSCLC\*:ab,ti OR 'lung adenocarcinoma':ab,ti) AND ('metastasis'/exp OR 'stage IV':ab,ti OR 'stage 4':ab,ti OR 'stage IIIB':ab,ti OR 'stage 3B':ab,ti OR metastatic:ab,ti OR metastas\*:ab,ti OR advanced:ab,ti) AND ('mortality'/exp OR 'survival'/exp OR mortality:ab,ti OR death\*:ab,ti OR survival:ab,ti) AND ('phase 3 clinical trial'/exp OR 'phase III':ti OR 'phase 3':ti OR 'controlled clinical trial'/exp OR 'controlled clinical trial':ti OR 'randomized controlled trial':ti OR 'randomized clinical trial':ti OR 'randomised controlled trial':ti OR 'randomised clinical trial':ti OR rct:ti NOT ('phase 2 clinical trial'/exp OR 'phase II':ti OR 'phase 2':ti)) AND [english]/lim NOT 'conference abstract'/it

### 3. *Carboplatin pemetrexed*

((carboplatin/exp OR carboplatin\*:ab,ti) AND ('pemetrexed'/exp OR pemetrexed:ab,ti) AND ('non small cell lung cancer'/exp OR 'non small cell lung carcinoma':ab,ti OR 'non small cell lung cancer':ab,ti OR NSCLC\*:ab,ti OR 'lung adenocarcinoma':ab,ti) AND ('metastasis'/exp OR 'stage IV':ab,ti OR 'stage 4':ab,ti OR 'stage IIIB':ab,ti OR 'stage 3B':ab,ti OR metastatic:ab,ti OR metastas\*:ab,ti OR advanced:ab,ti) AND ('mortality'/exp OR 'survival'/exp OR mortality:ab,ti OR death\*:ab,ti OR survival:ab,ti) AND ('phase 3 clinical trial'/exp OR 'phase III':ti OR 'phase 3':ti OR 'controlled clinical trial'/exp OR 'controlled clinical trial':ti OR 'randomized controlled trial':ti OR 'randomized clinical trial':ti OR 'randomised controlled trial':ti OR 'randomised clinical trial':ti OR rct:ti NOT ('phase 2 clinical trial'/exp OR 'phase II':ti OR 'phase 2':ti)) AND [english]/lim NOT 'conference abstract'/it

### 4. *Carboplatin gemcitabine*

((carboplatin/exp OR carboplatin\*:ab,ti) AND ('gemcitabine'/exp OR gemcitabin\*:ab,ti) AND ('non small cell lung cancer'/exp OR 'non small cell lung carcinoma':ab,ti OR 'non small cell lung cancer':ab,ti OR NSCLC\*:ab,ti OR 'lung adenocarcinoma':ab,ti) AND ('metastasis'/exp OR 'stage IV':ab,ti OR 'stage 4':ab,ti OR 'stage IIIB':ab,ti OR 'stage 3B':ab,ti OR metastatic:ab,ti OR metastas\*:ab,ti OR advanced:ab,ti) AND ('mortality'/exp OR 'survival'/exp OR mortality:ab,ti OR death\*:ab,ti OR survival:ab,ti) AND ('phase 3 clinical trial'/exp OR 'phase III':ti OR 'phase 3':ti OR 'controlled clinical trial'/exp OR 'controlled clinical trial':ti OR 'randomized controlled trial':ti OR 'randomized clinical trial':ti OR 'randomised controlled trial':ti OR 'randomised clinical trial':ti OR rct:ti NOT ('phase 2 clinical trial'/exp OR 'phase II':ti OR 'phase 2':ti)) AND [english]/lim NOT 'conference abstract'/it

#### 5. *Bevacizumab carboplatin paclitaxel*

(('bevacizumab'/exp OR bevacizumab:ab,ti) AND ('carboplatin'/exp OR carboplatin\*:ab,ti) AND ('paclitaxel'/exp OR paclitaxel:ab,ti)) AND ('non small cell lung cancer'/exp OR 'non small cell lung carcinoma':ab,ti OR 'non small cell lung cancer':ab,ti OR NSCLC\*:ab,ti OR 'lung adenocarcinoma':ab,ti) AND ('metastasis'/exp OR 'stage IV':ab,ti OR 'stage 4':ab,ti OR 'stage IIIB':ab,ti OR 'stage 3B':ab,ti OR metastatic:ab,ti OR metastas\*:ab,ti OR advanced:ab,ti) AND ('mortality'/exp OR 'survival'/exp OR mortality:ab,ti OR death\*:ab,ti OR survival:ab,ti) AND ('phase 3 clinical trial'/exp OR 'phase III':ti OR 'phase 3':ti OR 'controlled clinical trial'/exp OR 'controlled clinical trial':ti OR 'randomized controlled trial':ti OR 'randomized clinical trial':ti OR 'randomised controlled trial':ti OR 'randomised clinical trial':ti OR rct:ti NOT ('phase 2 clinical trial'/exp OR 'phase II':ti OR 'phase 2':ti)) AND [english]/lim NOT 'conference abstract'/it

#### 6. *Carboplatin docetaxel*

(('carboplatin'/exp OR carboplatin\*:ab,ti) AND ('docetaxel'/exp OR docetaxel:ab,ti)) AND ('non small cell lung cancer'/exp OR 'non small cell lung carcinoma':ab,ti OR 'non small cell lung cancer':ab,ti OR NSCLC\*:ab,ti OR 'lung adenocarcinoma':ab,ti) AND ('metastasis'/exp OR 'stage IV':ab,ti OR 'stage 4':ab,ti OR 'stage IIIB':ab,ti OR 'stage 3B':ab,ti OR metastatic:ab,ti OR metastas\*:ab,ti OR advanced:ab,ti) AND ('mortality'/exp OR 'survival'/exp OR mortality:ab,ti OR death\*:ab,ti OR survival:ab,ti) AND ('phase 3 clinical trial'/exp OR 'phase III':ti OR 'phase 3':ti OR 'controlled clinical trial'/exp OR 'controlled clinical trial':ti OR 'randomized controlled trial':ti OR 'randomized clinical trial':ti OR 'randomised controlled trial':ti OR 'randomised clinical trial':ti OR rct:ti NOT ('phase 2 clinical trial'/exp OR 'phase II':ti OR 'phase 2':ti)) AND [english]/lim NOT 'conference abstract'/it

#### 7. *Gefitinib*

('gefitinib'/exp OR gefitinib:ab,ti) AND ('non small cell lung cancer'/exp OR 'non small cell lung carcinoma':ab,ti OR 'non small cell lung cancer':ab,ti OR NSCLC\*:ab,ti OR 'lung adenocarcinoma':ab,ti) AND ('metastasis'/exp OR 'stage IV':ab,ti OR 'stage 4':ab,ti OR 'stage IIIB':ab,ti OR 'stage 3B':ab,ti OR metastatic:ab,ti OR metastas\*:ab,ti OR advanced:ab,ti) AND ('mortality'/exp OR 'survival'/exp OR mortality:ab,ti OR death\*:ab,ti OR survival:ab,ti) AND ('phase 3 clinical trial'/exp OR 'phase III':ti OR 'phase 3':ti OR 'controlled clinical trial'/exp OR 'controlled clinical trial':ti OR 'randomized controlled trial':ti OR 'randomized clinical trial':ti OR 'randomised controlled trial':ti OR 'randomised clinical trial':ti OR rct:ti NOT ('phase 2 clinical trial'/exp OR 'phase II':ti OR 'phase 2':ti)) AND [english]/lim NOT 'conference abstract'/it

#### 8. *Erlotinib*

('erlotinib'/exp OR erlotinib:ab,ti) AND ('non small cell lung cancer'/exp OR 'non small cell lung carcinoma':ab,ti OR 'non small cell lung cancer':ab,ti OR NSCLC\*:ab,ti OR 'lung adenocarcinoma':ab,ti) AND ('metastasis'/exp OR 'stage IV':ab,ti OR 'stage 4':ab,ti OR 'stage IIIB':ab,ti OR 'stage 3B':ab,ti OR metastatic:ab,ti OR metastas\*:ab,ti OR advanced:ab,ti) AND ('mortality'/exp OR 'survival'/exp OR mortality:ab,ti OR death\*:ab,ti OR survival:ab,ti) AND ('phase 3 clinical trial'/exp OR 'phase III':ti OR 'phase 3':ti OR 'controlled clinical trial'/exp OR 'controlled clinical trial':ti OR 'randomized controlled trial':ti OR 'randomized clinical trial':ti OR 'randomised controlled trial':ti OR 'randomised clinical trial':ti OR rct:ti NOT ('phase 2 clinical trial'/exp OR 'phase II':ti OR 'phase 2':ti)) AND [english]/lim NOT 'conference abstract'/it

### **CENTRAL (Cochrane library); search on September 1, 2017**

#### 1. *Cisplatin pemetrexed*

(cisplatin\*:ab,ti AND pemetrexed:ab,ti) AND ('non small cell lung carcinoma':ab,ti OR 'non small cell lung cancer':ab,ti OR NSCLC\*:ab,ti OR 'lung adenocarcinoma':ab,ti) AND ('stage IV':ab,ti OR 'stage 4':ab,ti OR 'stage IIIB':ab,ti OR 'stage 3B':ab,ti OR metastatic:ab,ti OR metastas\*:ab,ti OR advanced:ab,ti) AND (mortality:ab,ti OR death\*:ab,ti OR survival:ab,ti) AND ('phase 3':ti OR 'phase III':ti)

#### 2. *Cisplatin gemcitabine*

(cisplatin\*:ab,ti AND gemcitabin\*:ab,ti) AND ('non small cell lung carcinoma':ab,ti OR 'non small cell lung cancer':ab,ti OR NSCLC\*:ab,ti OR 'lung adenocarcinoma':ab,ti) AND ('stage IV':ab,ti OR 'stage 4':ab,ti OR 'stage IIIB':ab,ti OR 'stage 3B':ab,ti OR metastatic:ab,ti OR metastas\*:ab,ti OR advanced:ab,ti) AND (mortality:ab,ti OR death\*:ab,ti OR survival:ab,ti) AND ('phase 3':ti OR 'phase III':ti)

3. *Carboplatin pemetrexed*

(carboplatin\*:ab,ti AND pemetrexed:ab,ti) AND ('non small cell lung carcinoma':ab,ti OR 'non small cell lung cancer':ab,ti OR NSCLC\*:ab,ti OR 'lung adenocarcinoma':ab,ti) AND ('stage IV':ab,ti OR 'stage 4':ab,ti OR 'stage IIIB':ab,ti OR 'stage 3B':ab,ti OR metastatic:ab,ti OR metastas\*:ab,ti OR advanced:ab,ti) AND (mortality:ab,ti OR death\*:ab,ti OR survival:ab,ti) AND ('phase 3':ti OR 'phase III':ti)

4. *Carboplatin gemcitabine*

(carboplatin\*:ab,ti AND gemcitabin\*:ab,ti) AND ('non small cell lung carcinoma':ab,ti OR 'non small cell lung cancer':ab,ti OR NSCLC\*:ab,ti OR 'lung adenocarcinoma':ab,ti) AND ('stage IV':ab,ti OR 'stage 4':ab,ti OR 'stage IIIB':ab,ti OR 'stage 3B':ab,ti OR metastatic:ab,ti OR metastas\*:ab,ti OR advanced:ab,ti) AND (mortality:ab,ti OR death\*:ab,ti OR survival:ab,ti) AND ('phase 3':ti OR 'phase III':ti)

5. *Bevacizumab carboplatin paclitaxel*

(bevacizumab:ab,ti AND carboplatin\*:ab,ti AND paclitaxel:ab,ti) AND ('non small cell lung carcinoma':ab,ti OR 'non small cell lung cancer':ab,ti OR NSCLC\*:ab,ti OR 'lung adenocarcinoma':ab,ti) AND ('stage IV':ab,ti OR 'stage 4':ab,ti OR 'stage IIIB':ab,ti OR 'stage 3B':ab,ti OR metastatic:ab,ti OR metastas\*:ab,ti OR advanced:ab,ti) AND (mortality:ab,ti OR death\*:ab,ti OR survival:ab,ti) AND ('phase 3':ti OR 'phase III':ti)

6. *Carboplatin docetaxel*

(carboplatin\*:ab,ti AND docetaxel:ab,ti) AND ('non small cell lung carcinoma':ab,ti OR 'non small cell lung cancer':ab,ti OR NSCLC\*:ab,ti OR 'lung adenocarcinoma':ab,ti) AND ('stage IV':ab,ti OR 'stage 4':ab,ti OR 'stage IIIB':ab,ti OR 'stage 3B':ab,ti OR metastatic:ab,ti OR metastas\*:ab,ti OR advanced:ab,ti) AND (mortality:ab,ti OR death\*:ab,ti OR survival:ab,ti) AND ('phase 3':ti OR 'phase III':ti)

7. *Gefitinib*

(gefitinib:ab,ti) AND ('non small cell lung carcinoma':ab,ti OR 'non small cell lung cancer':ab,ti OR NSCLC\*:ab,ti OR 'lung adenocarcinoma':ab,ti) AND ('stage IV':ab,ti OR 'stage 4':ab,ti OR 'stage IIIB':ab,ti OR 'stage 3B':ab,ti OR metastatic:ab,ti OR metastas\*:ab,ti OR advanced:ab,ti) AND (mortality:ab,ti OR death\*:ab,ti OR survival:ab,ti) AND ('phase 3':ti OR 'phase III':ti)

8. *Erlotinib*

(erlotinib:ab,ti) AND ('non small cell lung carcinoma':ab,ti OR 'non small cell lung cancer':ab,ti OR NSCLC\*:ab,ti OR 'lung adenocarcinoma':ab,ti) AND ('stage IV':ab,ti OR 'stage 4':ab,ti OR 'stage IIIB':ab,ti OR 'stage 3B':ab,ti OR metastatic:ab,ti OR metastas\*:ab,ti OR advanced:ab,ti) AND (mortality:ab,ti OR death\*:ab,ti OR survival:ab,ti) AND ('phase 3':ti OR 'phase III':ti)

## APPENDIX 2      Flow charts and reference tables clinical trial outcomes

**STable 1. Clinical trial reference outcomes**

| <b>Chemotherapy regimen</b>                       | <b>Median OS clinical trials (months)</b> |
|---------------------------------------------------|-------------------------------------------|
| 1. Cisplatin pemetrexed                           | 10.19                                     |
| 2. Cisplatin gemcitabine                          | 9.88                                      |
| 3. Carboplatin pemetrexed                         | 10.18                                     |
| 4. Carboplatin gemcitabine                        | 8.75                                      |
| 5. Bevacizumab carboplatin paclitaxel             | 12.57                                     |
| 6. Carboplatin docetaxel                          | 9.52                                      |
| 7. Gefitinib (in EGFR-mutation positive patients) | 24.90                                     |
| 8. Erlotinib (in EGFR-mutation positive patients) | 22.01                                     |
| <b>Overall</b>                                    | <b>10.84</b>                              |

## 1. Cisplatin pemetrexed

**SFigure 1. Flowchart cisplatin-pemetrexed**

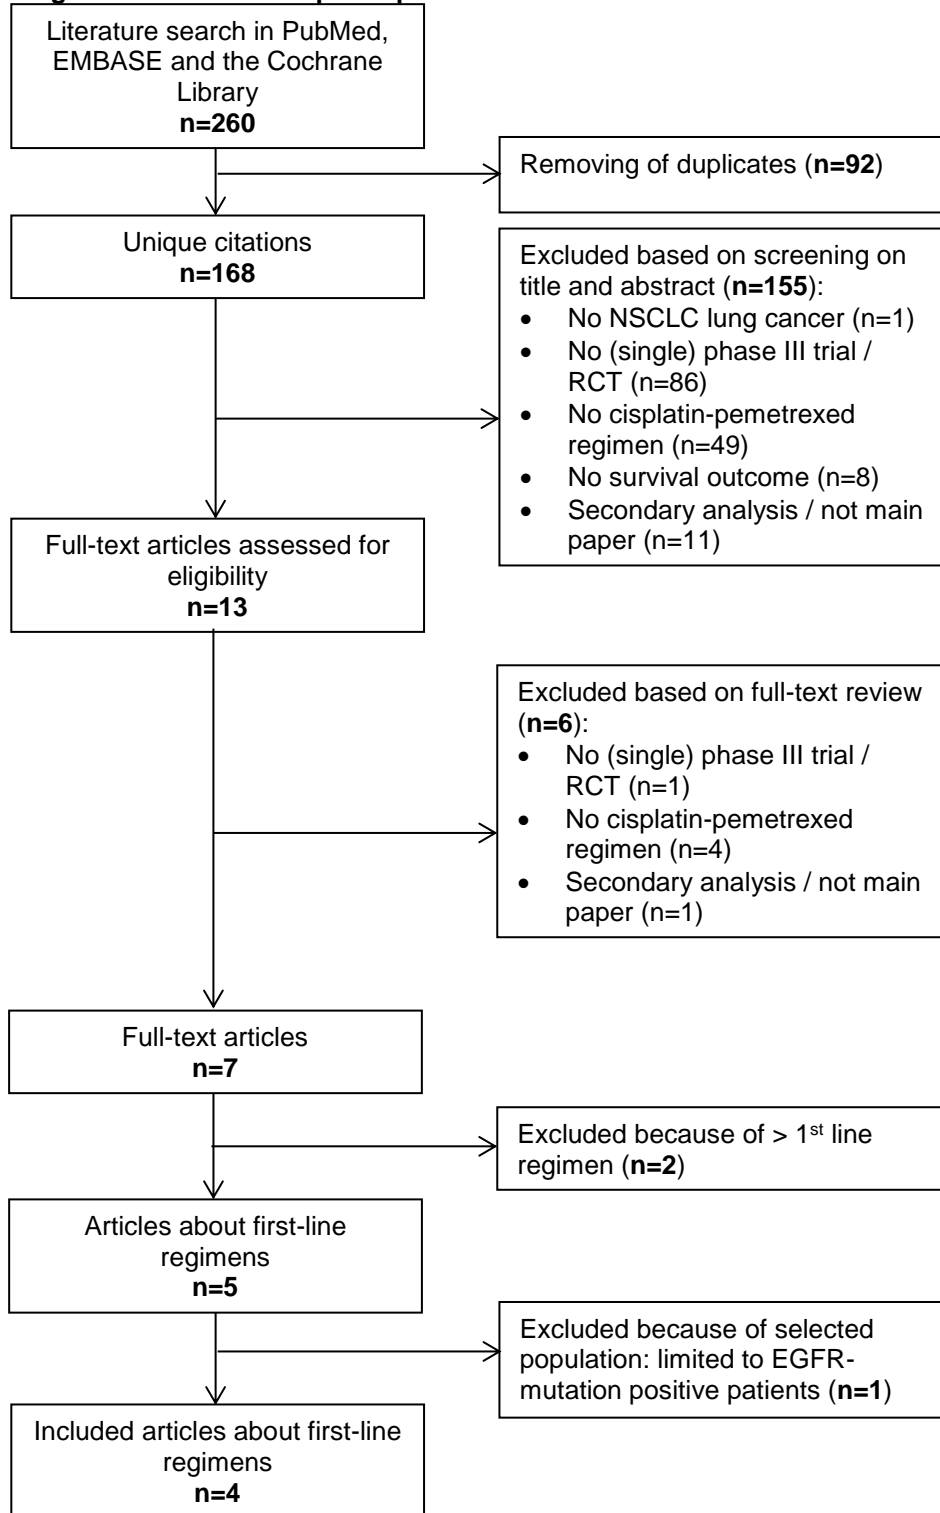



**SFigure 2. Forest plot cisplatin-pemetrexed**

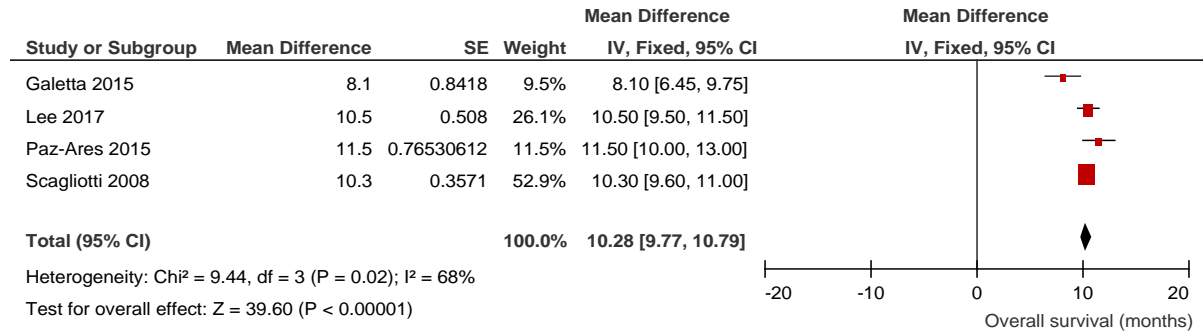

**STable 2. Clinical trial and real-world characteristics regimen cisplatin-pemetrexed**

| Characteristic                 | Clinical trials <sup>a</sup> | Real-world |
|--------------------------------|------------------------------|------------|
| Total number of patients       | 1470                         | 347        |
| Overall survival (months)      | 10.19                        | 8.90       |
| Median age (years)             | 60.6                         | 59         |
| Male (%)                       | 66.1                         | 49         |
| Stage IV (%)                   | 87.8                         | 100        |
| ECOG Performance Status        |                              |            |
| ECOG PS 0-1 (%)                | 98.5                         | 87         |
| ECOG PS ≥2 (%)                 | 1.5                          | 8          |
| Missing                        | ---                          | 5          |
| Histology                      |                              |            |
| squamous (%)                   | 9.4                          | 1          |
| adenocarcinoma (%)             | 79.2                         | 82         |
| large-cell (%)                 | 6.6                          | 4          |
| other or unknown histology (%) | 4.8                          | 14         |

<sup>a</sup>Histology based on 3 references

## 2. Cisplatin gemcitabine

**SFigure 3. Flowchart cisplatin-gemcitabine**

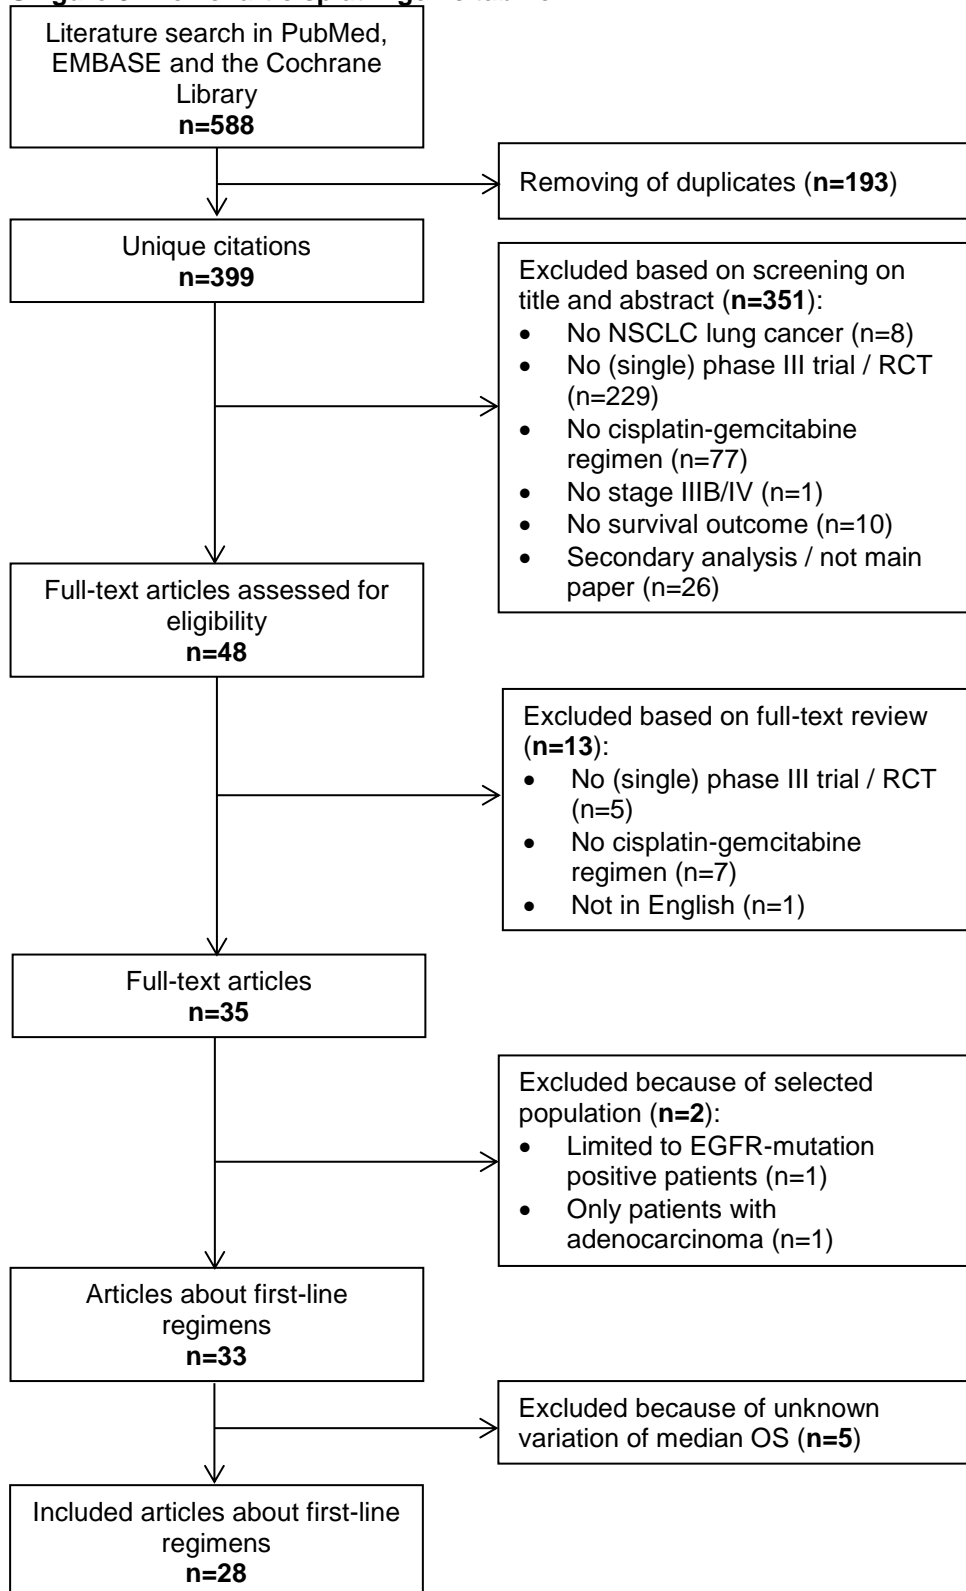

**SFigure 4. Forest plot cisplatin-gemcitabine**

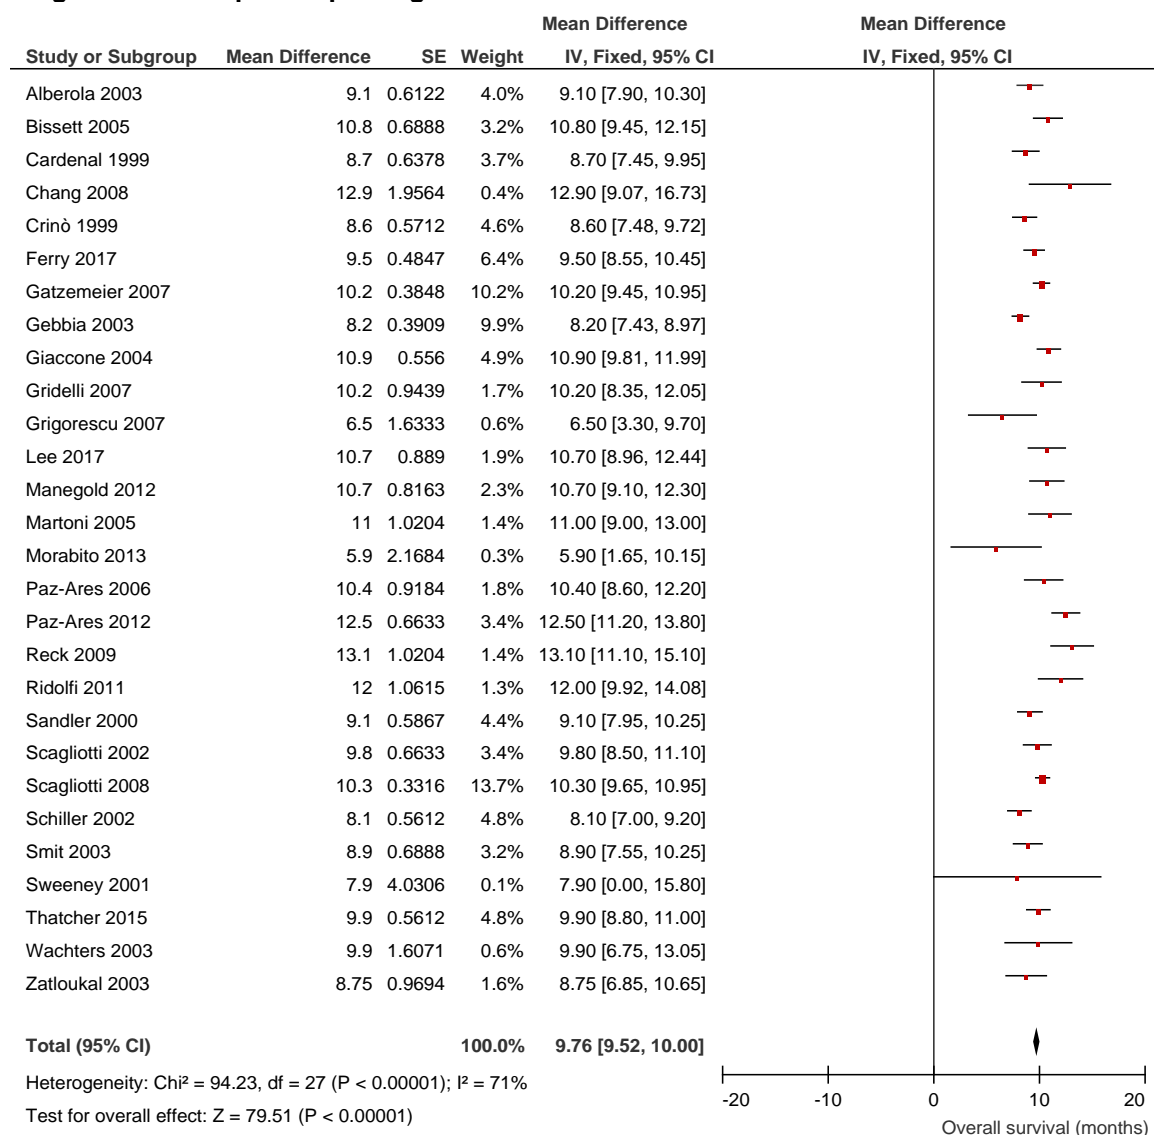

**Stable 3. Clinical trial and real-world characteristics regimen cisplatin-gemcitabine**

| Characteristic                 | Clinical trials <sup>a</sup> | Real-world |
|--------------------------------|------------------------------|------------|
| Total number of patients       | 6736                         | 214        |
| Overall survival (months)      | 9.88                         | 7.90       |
| Median age (years)             | 61.0                         | 63         |
| Male (%)                       | 74.7                         | 59         |
| Stage IV (%)                   | 72.1                         | 100        |
| ECOG Performance Status        |                              |            |
| ECOG PS 0-1 (%)                | 86.0                         | 86         |
| ECOG PS ≥2 (%)                 | 13.7                         | 6          |
| Missing                        | ---                          | 8          |
| Histology                      |                              |            |
| squamous (%)                   | 36.6                         | 48         |
| adenocarcinoma (%)             | 43.3                         | 32         |
| large-cell (%)                 | 7.7                          | 8          |
| other or unknown histology (%) | 12.3                         | 12         |

<sup>a</sup>ECOG based on 26 references; Histology based on 25 references

### 3. Carboplatin pemetrexed

**SFigure 5. Flowchart carboplatin-pemetrexed**

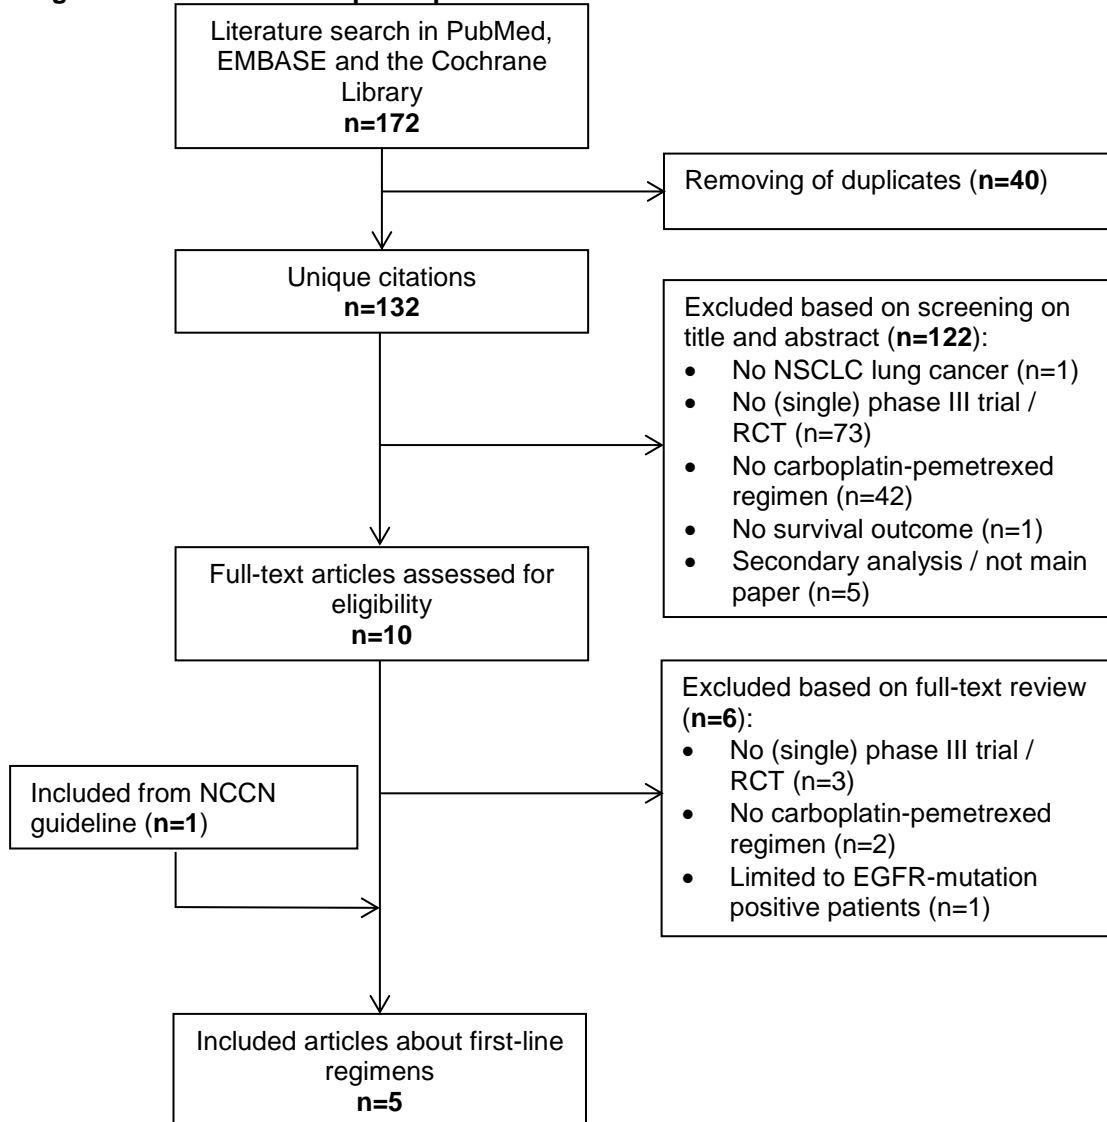

**SFigure 6. Forest plot carboplatin-pemetrexed**

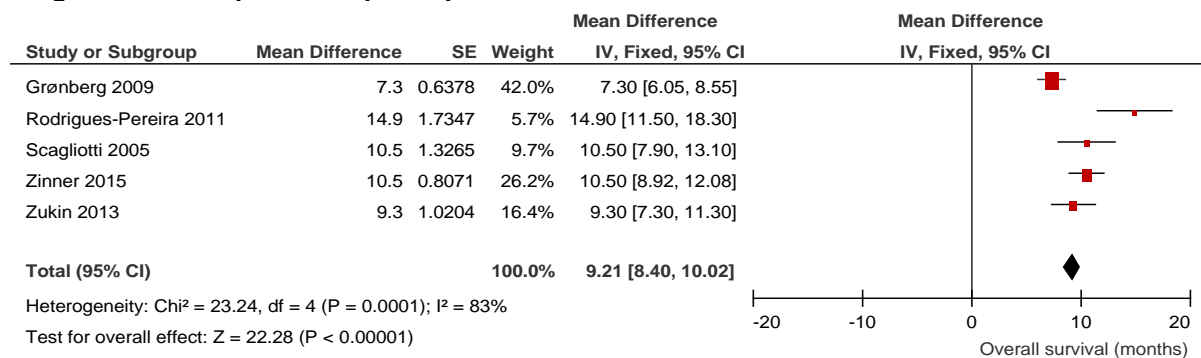

**STable 4. Clinical trial and real-world characteristics regimen carboplatin-pemetrexed**

| <b>Characteristic</b>          | <b>Clinical trials</b> | <b>Real-world</b> |
|--------------------------------|------------------------|-------------------|
| Total number of patients       | 649                    | 213               |
| Overall survival (months)      | 10.18                  | 6.51              |
| Median age (years)             | 64.0                   | 65                |
| Male (%)                       | 63.9                   | 62                |
| Stage IV (%)                   | 82.0                   | 100               |
| ECOG Performance Status        |                        |                   |
| ECOG PS 0-1 (%)                | 72.8                   | 81                |
| ECOG PS ≥2 (%)                 | 27.2                   | 16                |
| Missing                        | ---                    | 3                 |
| Histology                      |                        |                   |
| squamous (%)                   | 11.9                   | 1                 |
| adenocarcinoma (%)             | 68.4                   | 83                |
| large-cell (%)                 | 3.6                    | 9                 |
| other or unknown histology (%) | 13.5                   | 8                 |

#### 4. Carboplatin gemcitabine

**SFigure 7. Flowchart carboplatin-gemcitabine**

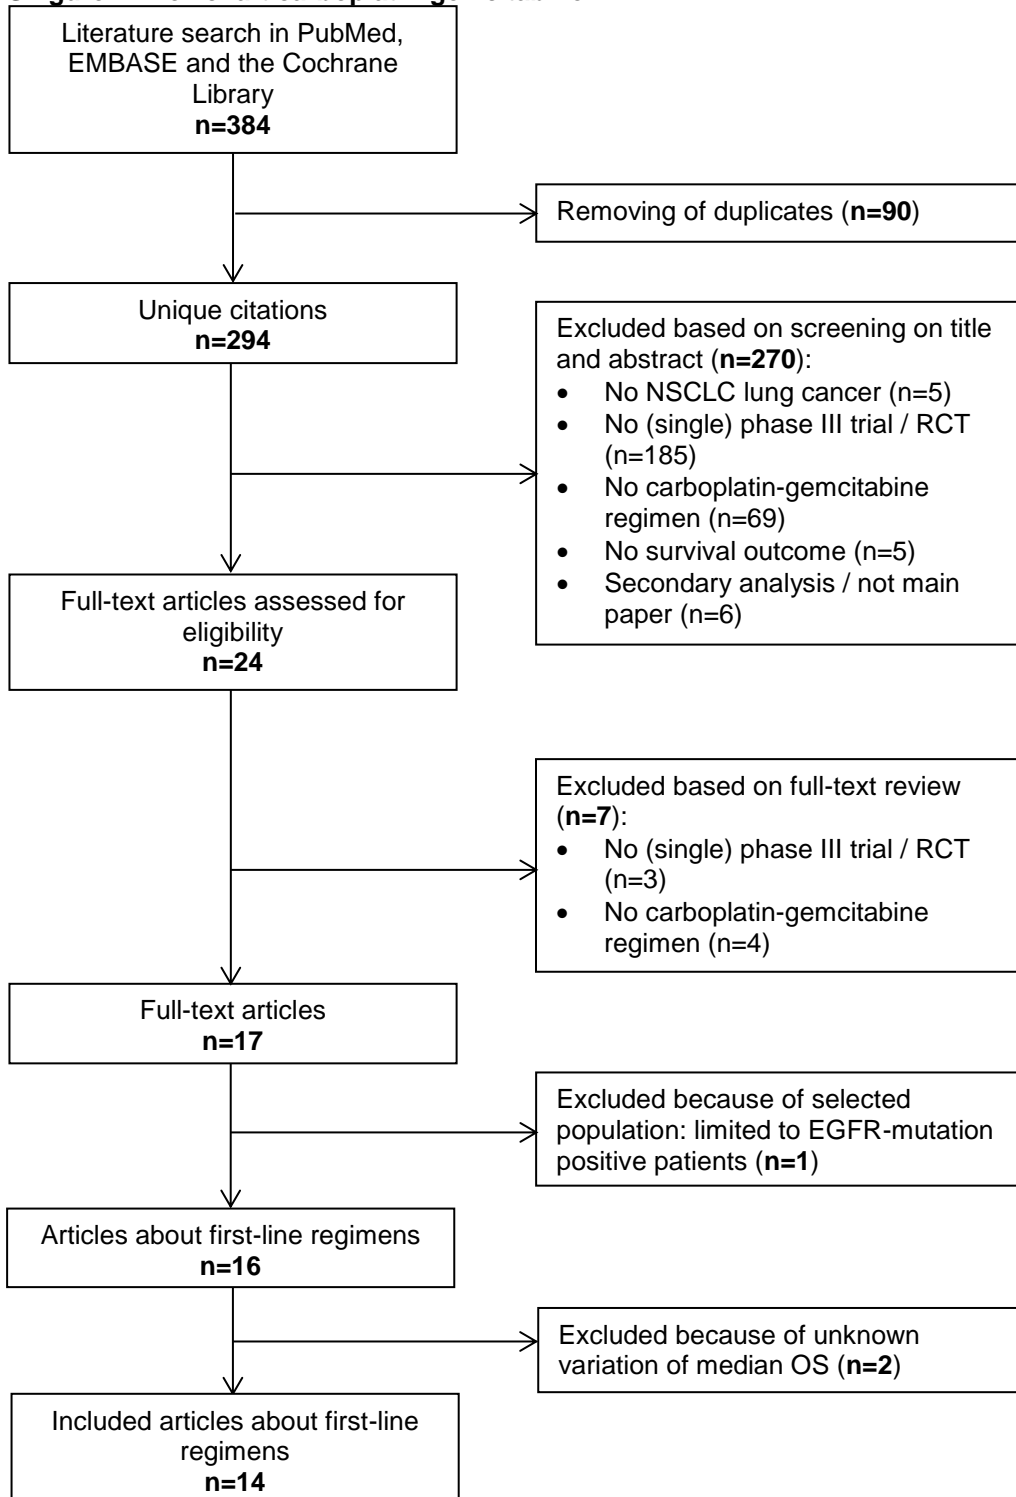

**SFigure 8. Forest plot carboplatin-gemcitabine**

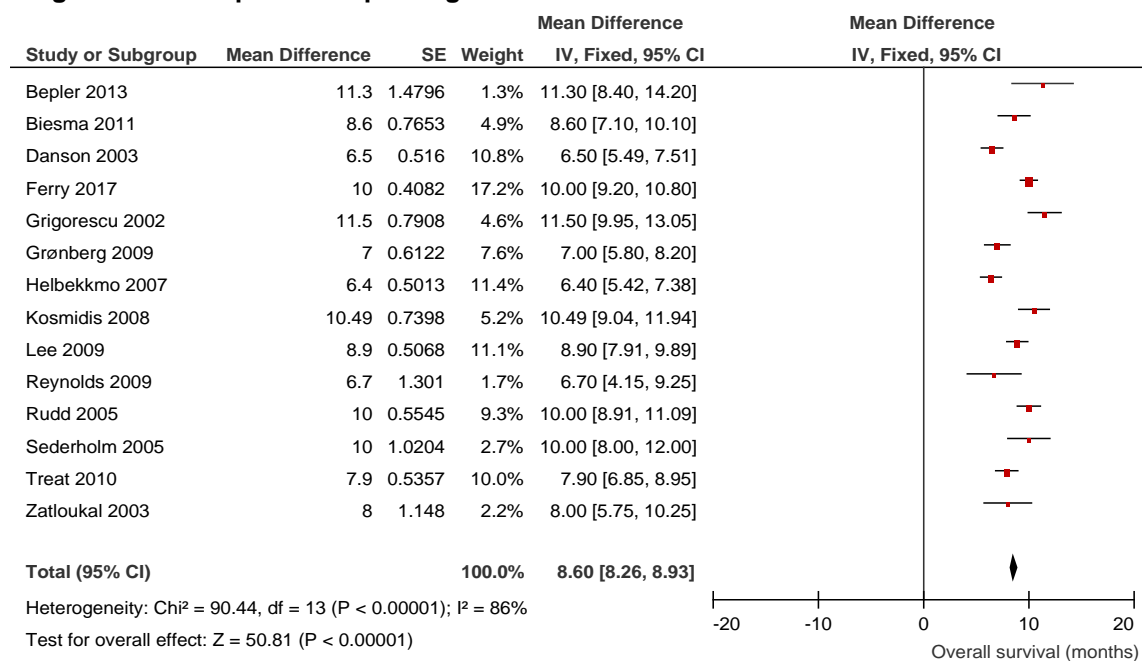

**Stable 5. Clinical trial and real-world characteristics regimen carboplatin-gemcitabine**

| Characteristic                 | Clinical trials | Real-world |
|--------------------------------|-----------------|------------|
| Total number of patients       | 2857            | 171        |
| Overall survival (months)      | 8.75            | 6.67       |
| Median age (years)             | 63.1            | 68         |
| Male (%)                       | 65.2            | 72         |
| Stage IV (%)                   | 67.9            | 100        |
| ECOG Performance Status        |                 |            |
| ECOG PS 0-1 (%)                | 77.0            | 80         |
| ECOG PS $\geq 2$ (%)           | 22.9            | 16         |
| Missing                        | ---             | 4          |
| Histology                      |                 |            |
| squamous (%)                   | 29.7            | 40         |
| adenocarcinoma (%)             | 39.4            | 30         |
| large-cell (%)                 | 6.1             | 18         |
| other or unknown histology (%) | 24.8            | 12         |

## 5. Carboplatin paclitaxel bevacizumab

**SFigure 9. Flowchart carboplatin-paclitaxel-bevacizumab**

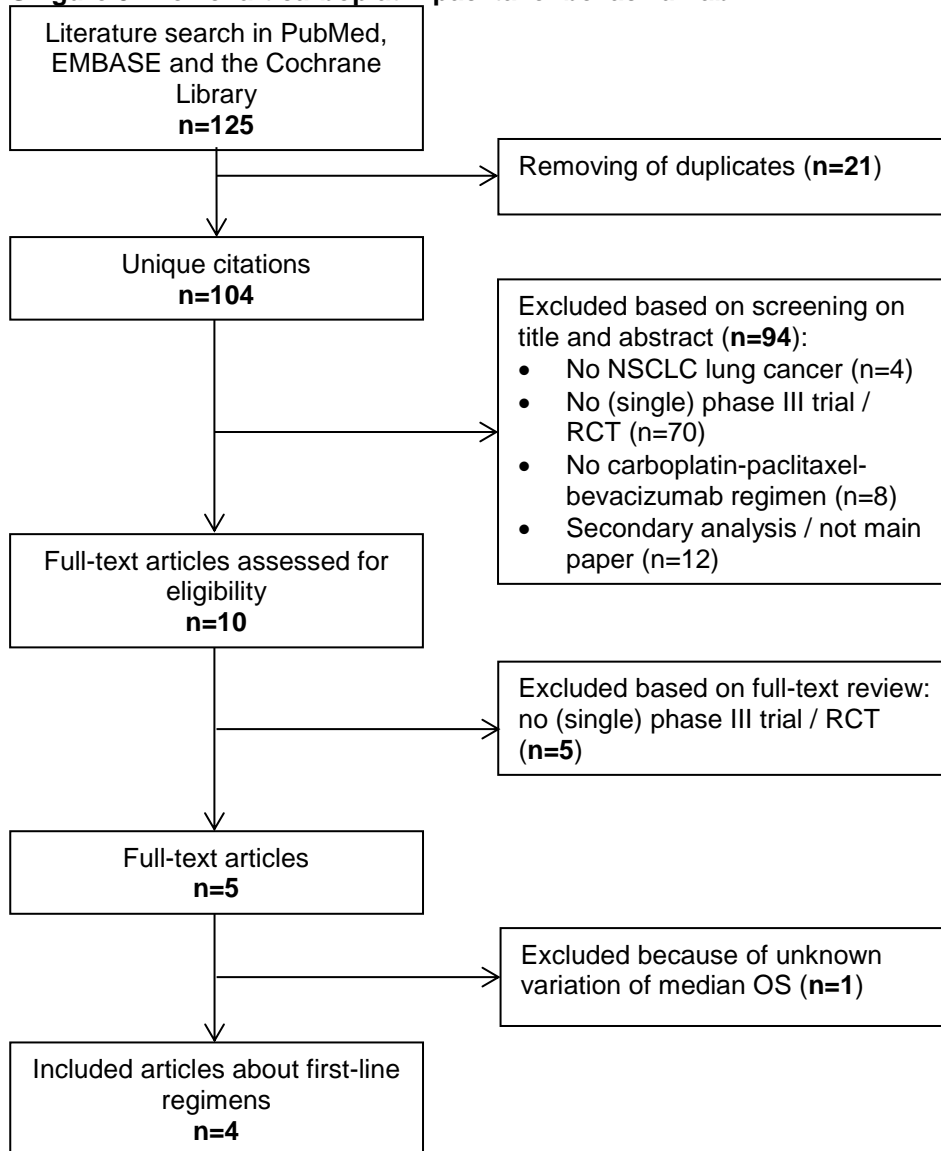

**SFigure 10. Forest plot carboplatin-paclitaxel-bevacizumab**

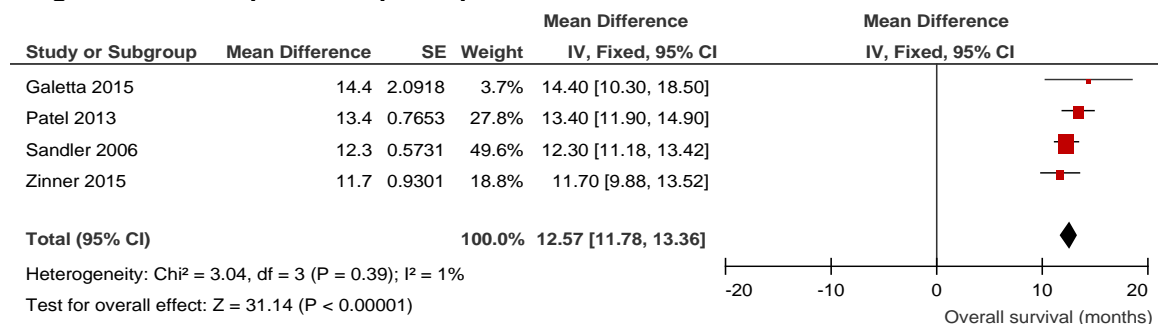



**STable 6. Clinical trial and real-world characteristics regimen carboplatin-paclitaxel-bevacizumab**

| <b>Characteristic</b>          | <b>Clinical trials</b> | <b>Real-world</b> |
|--------------------------------|------------------------|-------------------|
| Total number of patients       | 1121                   | 73                |
| Overall survival (months)      | 12.57                  | 8.18              |
| Median age (years)             | 64.9                   | 62                |
| Male (%)                       | 59.9                   | 48                |
| Stage IV (%)                   | 89.3                   | 100               |
| ECOG Performance Status        |                        |                   |
| ECOG PS 0-1 (%)                | 100                    | 90                |
| ECOG PS ≥2 (%)                 | 0                      | 7                 |
| Missing                        | ---                    | 3                 |
| Histology                      |                        |                   |
| squamous (%)                   | 0.0                    | 0                 |
| adenocarcinoma (%)             | 85.7                   | 84                |
| large-cell (%)                 | 3.8                    | 10                |
| other or unknown histology (%) | 10.5                   | 7                 |

## 6. Carboplatin docetaxel

**SFigure 11. Flowchart carboplatin-docetaxel**

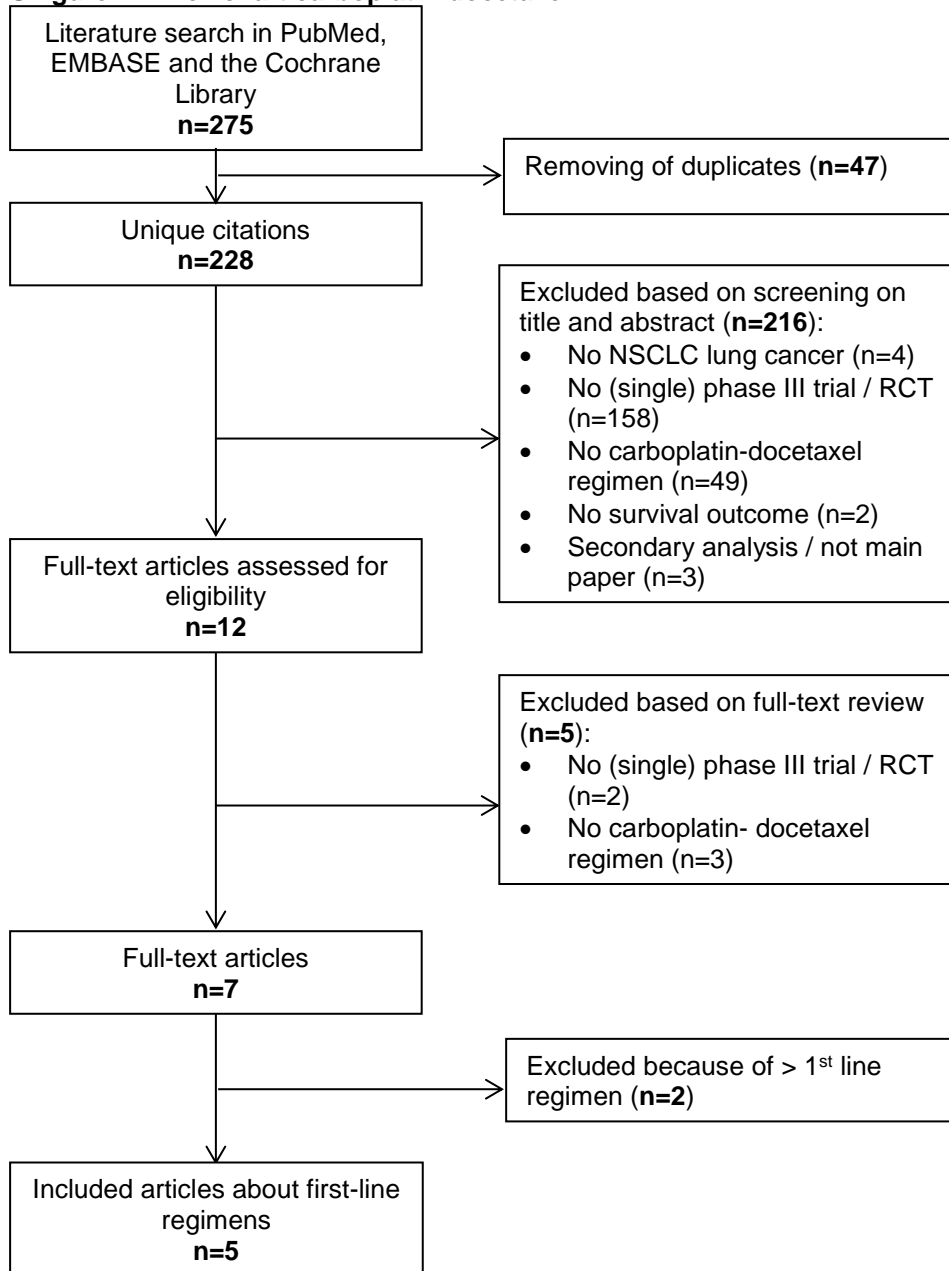

**SFigure 12. Forest plot carboplatin-docetaxel**

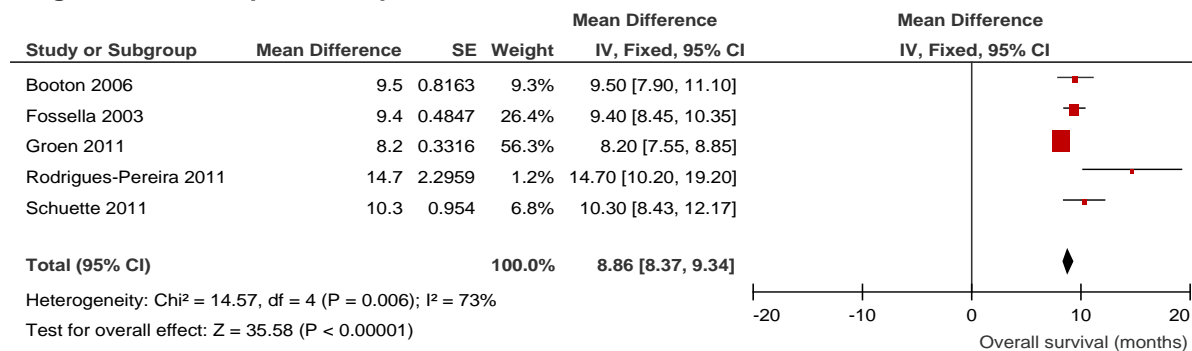

**STable 7. Clinical trial and real-world characteristics regimen carboplatin-docetaxel**

| Characteristic                 | Clinical trials <sup>a</sup> | Real-world |
|--------------------------------|------------------------------|------------|
| Total number of patients       | 1100                         | 45         |
| Overall survival (months)      | 9.52                         | 4.93       |
| Median age (years)             | 61.0                         | 59         |
| Male (%)                       | 66.6                         | 51         |
| Stage IV (%)                   | 72.0                         | 100        |
| ECOG Performance Status        |                              |            |
| ECOG PS 0-1 (%)                | 87.5                         | 89         |
| ECOG PS ≥2 (%)                 | 12.5                         | 9          |
| Missing                        | ---                          | 2          |
| Histology                      |                              |            |
| squamous (%)                   | 27.1                         | 9          |
| adenocarcinoma (%)             | 51.4                         | 51         |
| large-cell (%)                 | 10.5                         | 20         |
| other or unknown histology (%) | 11.0                         | 20         |

<sup>a</sup>ECOG based on 3 references

## 7. Gefitinib (in EGFR-mutation positive patients)

**SFigure 13. Flowchart gefitinib**

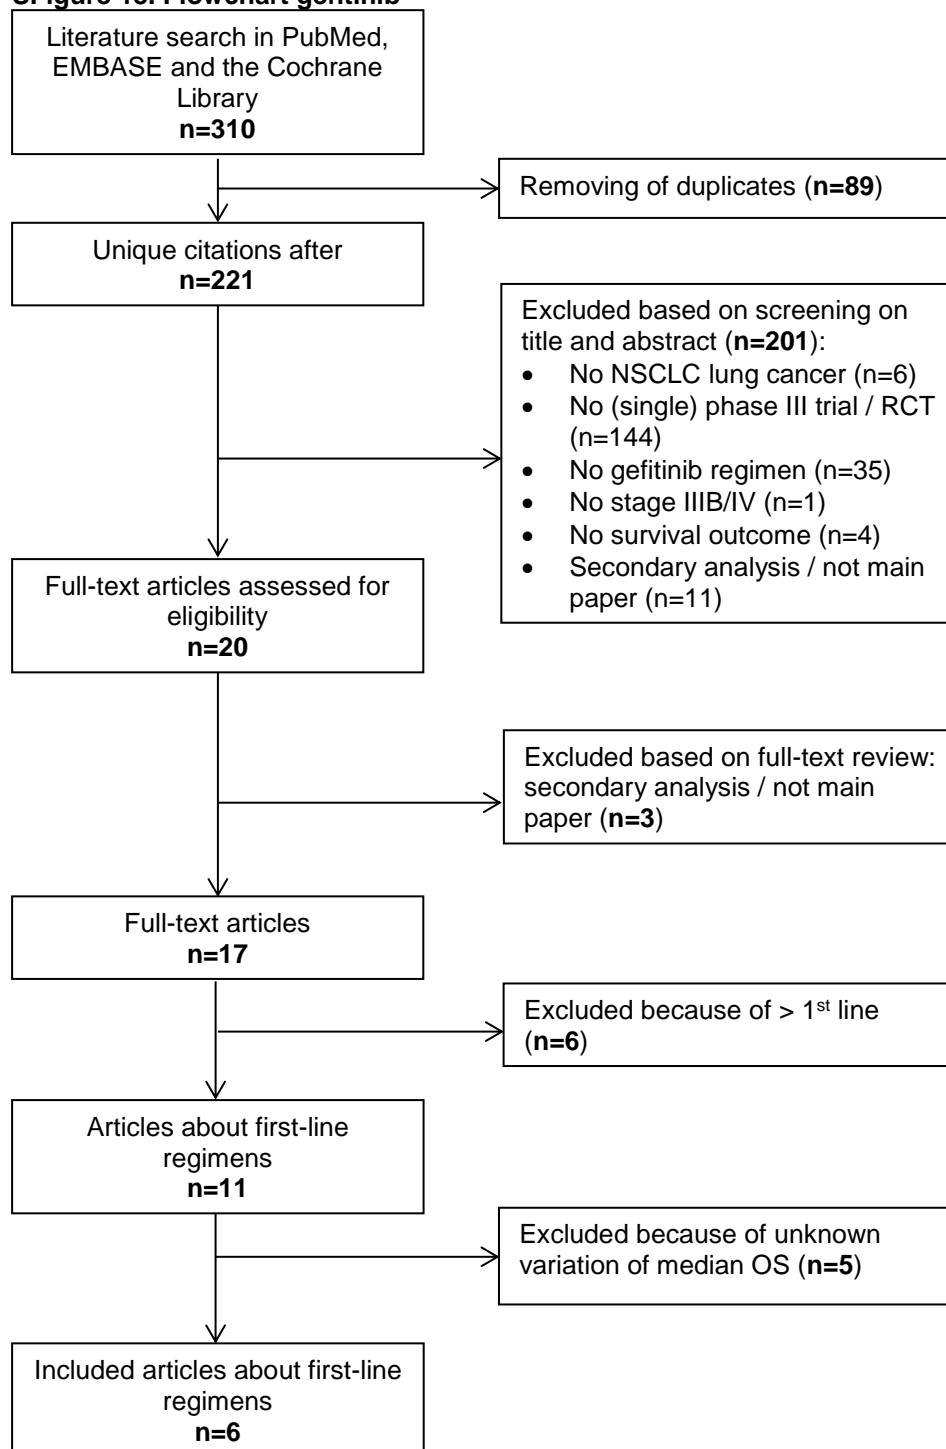

**SFigure 14. Forest plot gefitinib**

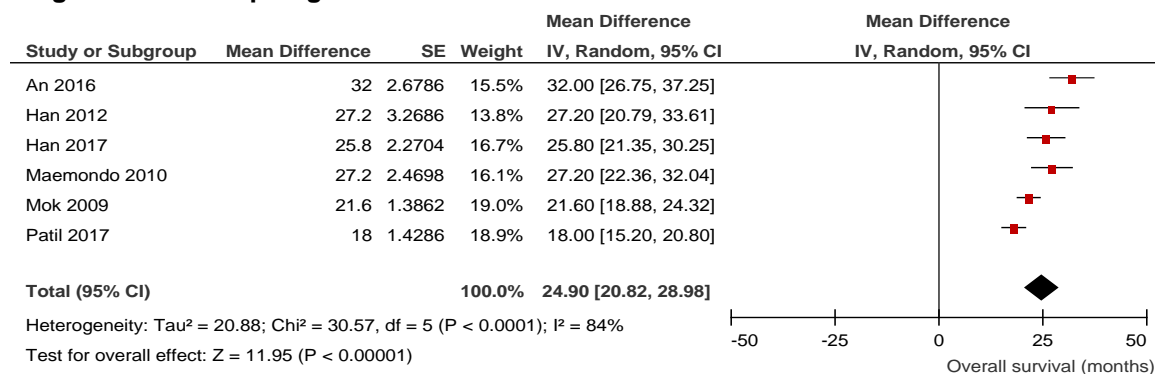

**STable 8. Clinical trial and real-world characteristics regimen gefitinib**

| Characteristic                 | Clinical trials <sup>a</sup> | Real-world |
|--------------------------------|------------------------------|------------|
| Total number of patients       | 503                          | 35         |
| Overall survival (months)      | 24.90                        | 21.19      |
| Median age (years)             | 63.9                         | 68         |
| Male (%)                       | 45.6                         | 43         |
| Stage IV (%)                   | 87.6                         | 100        |
| ECOG Performance Status        |                              |            |
| ECOG PS 0-1 (%)                | 97.4                         | 89         |
| ECOG PS ≥2 (%)                 | 2.6                          | 11         |
| Missing                        | ---                          | 0          |
| Histology                      |                              |            |
| squamous (%)                   | 0.4                          | 0          |
| adenocarcinoma (%)             | 98.2                         | 91         |
| large-cell (%)                 | 0.2                          | 0          |
| other or unknown histology (%) | 1.1                          | 9          |

<sup>a</sup>Note: the characteristics from 2 references are based on the whole patient group, not only on the EGFR+ group; ECOG PS based on 3 references

## 8. Erlotinib (in EGFR-mutation positive patients)

**SFigure 15. Flowchart erlotinib**

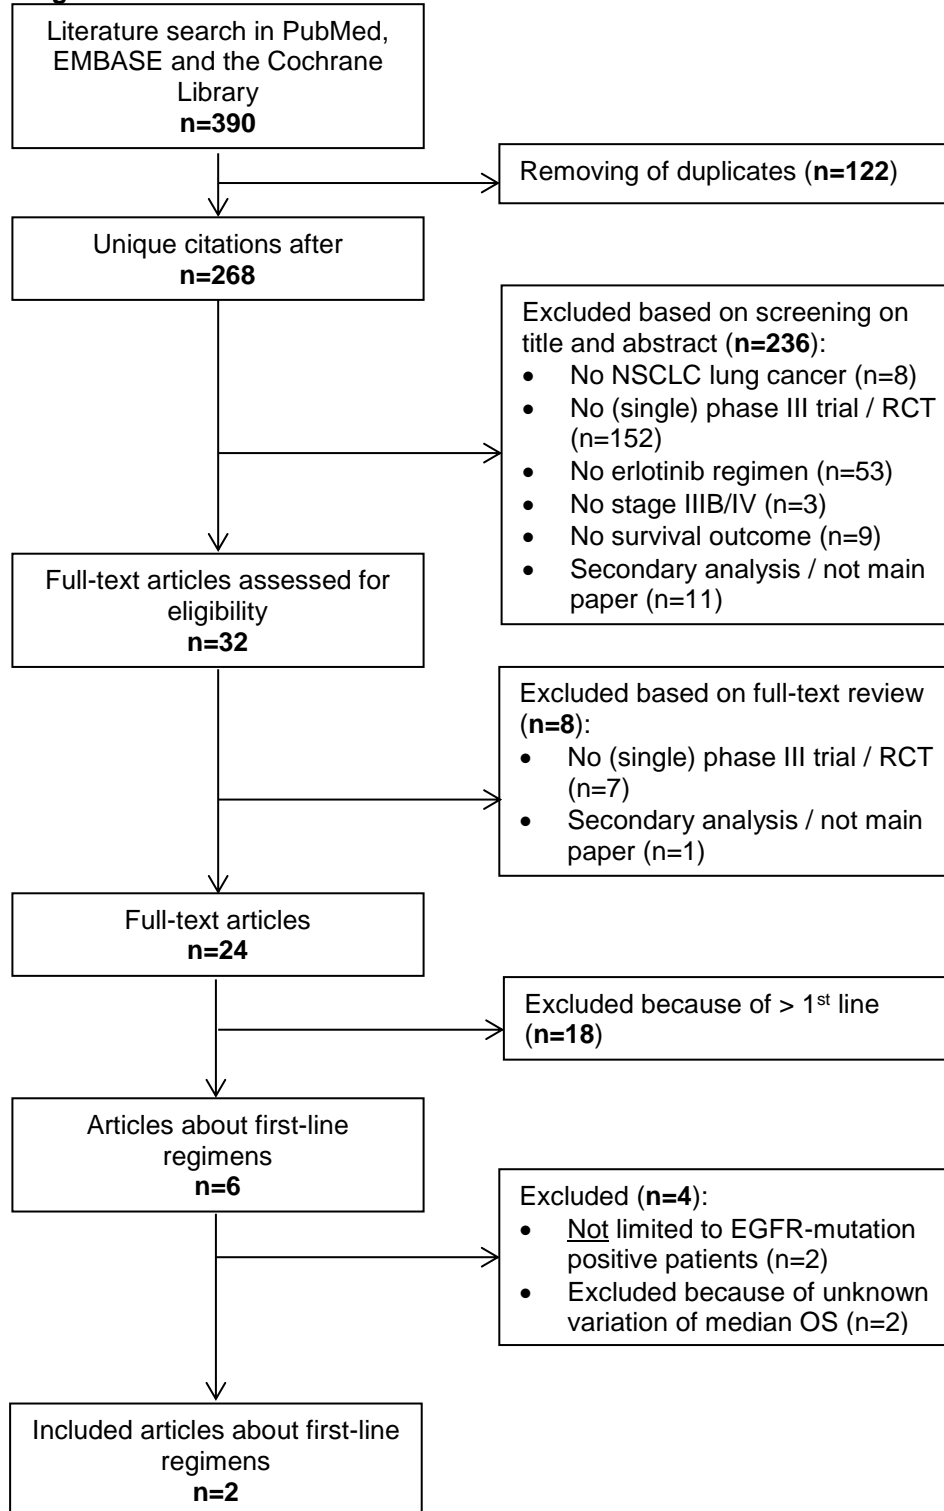

**SFigure 16. Forest plot erlotinib**

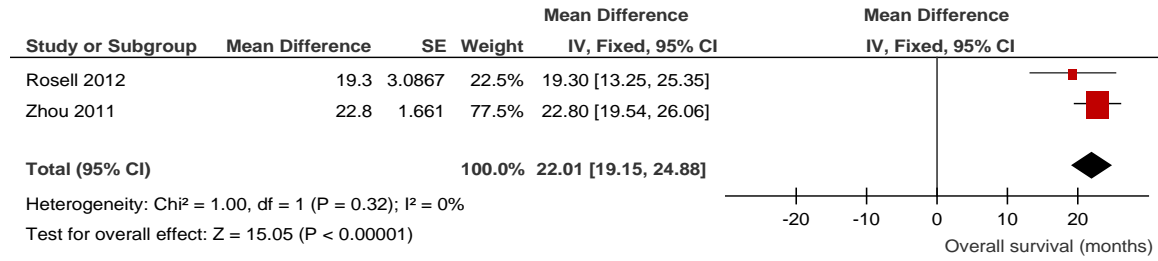

**STable 9. Clinical trial and real-world characteristics regimen erlotinib**

| Characteristic                 | Clinical trials <sup>a</sup> | Real-world |
|--------------------------------|------------------------------|------------|
| Total number of patients       | 168                          | 24         |
| Overall survival (months)      | 22.01                        | 14.32      |
| Median age (years)             | 61.0                         | 68         |
| Male (%)                       | 37.0                         | 25         |
| Stage IV (%)                   | 89.0                         | 100        |
| ECOG Performance Status        |                              |            |
| ECOG PS 0-1 (%)                | 88.5                         | 75         |
| ECOG PS ≥2 (%)                 | 11.5                         | 17         |
| Missing                        | ---                          | 8          |
| Histology                      |                              |            |
| squamous (%)                   | 1.0                          | 4          |
| adenocarcinoma (%)             | 95.0                         | 79         |
| large-cell (%)                 | 3.0                          | 0          |
| other or unknown histology (%) | 0.0                          | 17         |

<sup>a</sup>Histology based on 1 reference

**SFigure 17. Forest plot with overview of clinical trials for reference outcome first-line chemotherapy**

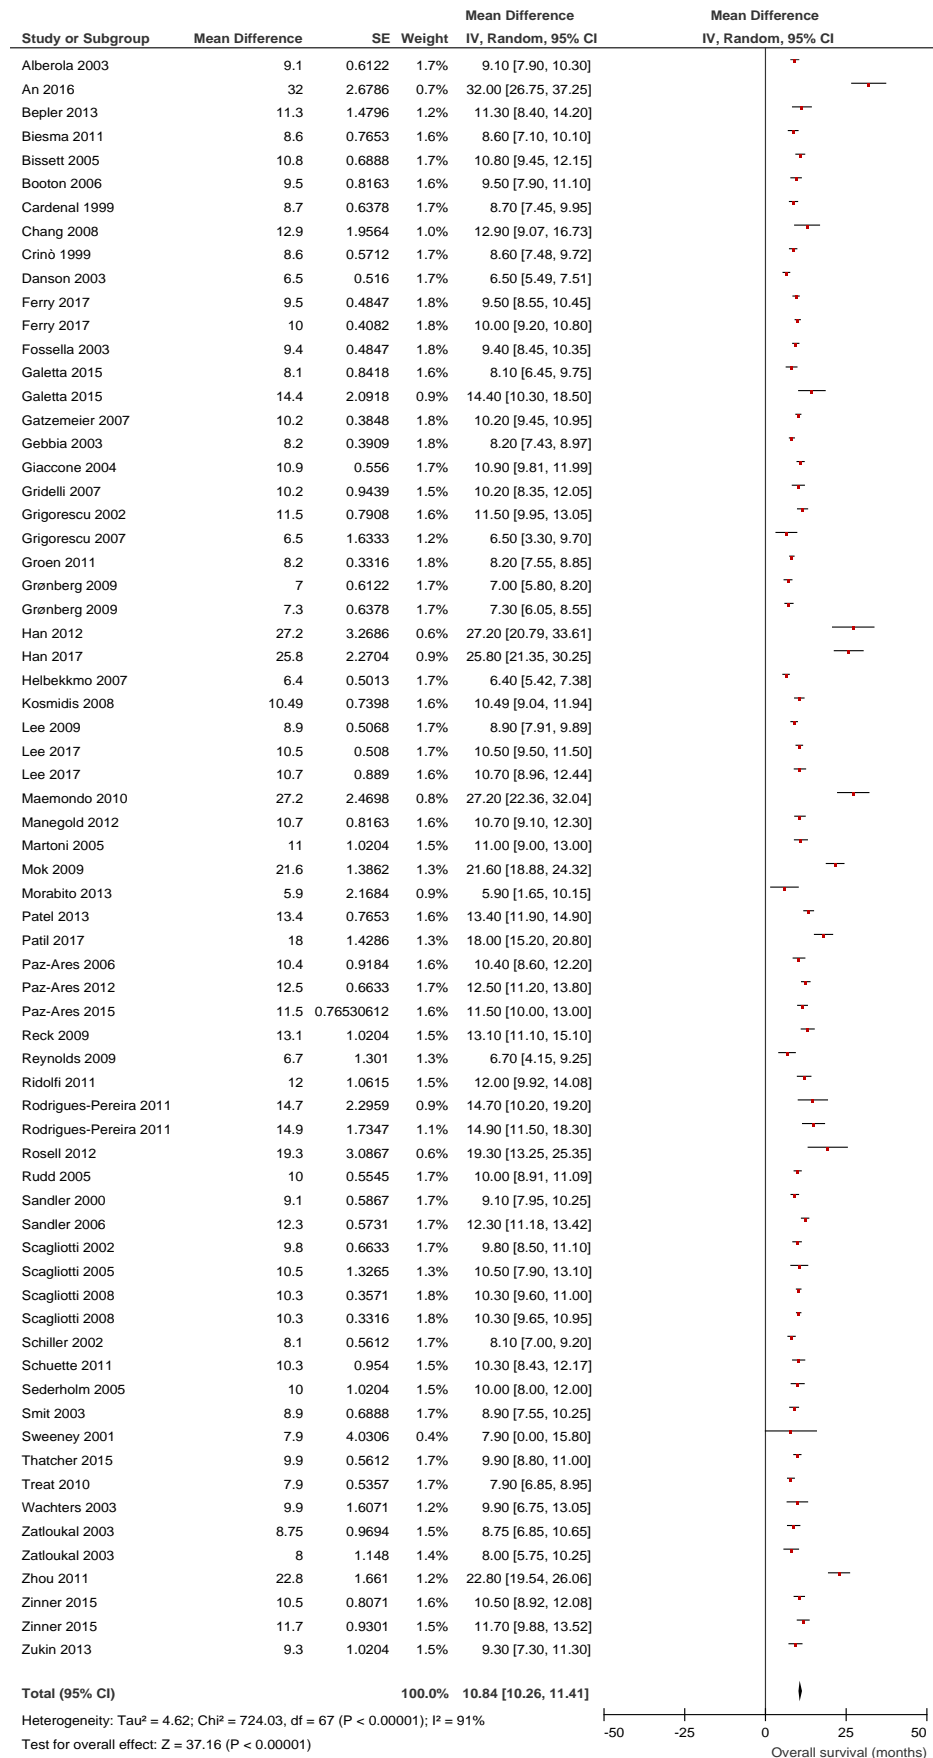



## APPENDIX 3 Proxies for toxicity

**STable 10. Dose reduction and switches to other systemic agents as proxies for toxicity**

|                                                    | Dose reduction <sup>a</sup> | Switch to other systemic agents <sup>b</sup> |
|----------------------------------------------------|-----------------------------|----------------------------------------------|
|                                                    | n (%)                       | n (%)                                        |
| Cisplatin pemetrexed                               | 44 (13)                     | 65 (19)                                      |
| Cisplatin gemcitabine                              | 41 (19)                     | 50 (23)                                      |
| Carboplatin pemetrexed                             | 38 (18)                     | 2 (1)                                        |
| Carboplatin gemcitabine                            | 66 (39)                     | 4 (2)                                        |
| Bevacizumab carboplatin paclitaxel                 | 12 (16)                     | 7 (10)                                       |
| Carboplatin docetaxel                              | 5 (11)                      | 2 (4)                                        |
| Gefitinib (in EGFR positive patients) <sup>c</sup> | 0                           | 0                                            |
| Erlotinib (in EGFR positive patients)              | 3 (13)                      | 1 (4)                                        |
| <b>Overall</b>                                     | <b>209 (19)</b>             | <b>131 (12)</b>                              |

<sup>a</sup>Missing values in 39 patients (3%)

<sup>b</sup>Missing values in 34 patients (3%)

<sup>c</sup>Possible underestimation as data about gefitinib from earlier years was not available in the databases

**STable 11. Co-morbidities in patients with early discontinuation of systemic therapy**

| Co-morbidity                | Early discontinuation |                     | p-value |
|-----------------------------|-----------------------|---------------------|---------|
|                             | Yes (n=469)<br>n (%)  | No (n=653)<br>n (%) |         |
| COPD                        | 92 (20)               | 108 (17)            | 0.206   |
| coronary artery disease     | 64 (14)               | 75 (12)             | 0.312   |
| diabetes                    | 54 (12)               | 60 (9)              | 0.229   |
| peripheral vascular disease | 52 (11)               | 64 (10)             | 0.488   |
| other cancer                | 29 (6)                | 39 (6)              | 0.900   |
| cerebrovascular disease     | 35 (8)                | 28 (4)              | 0.025   |
| congestive heart failure    | 18 (4)                | 16 (3)              | 0.217   |
| connective tissue disease   | 11 (2)                | 11 (2)              | 0.514   |

## **APPENDIX 4      List of included hospitals**

The individual Santeon hospitals include:

- Canisius Wilhelmina Hospital, Nijmegen, the Netherlands
- Catharina Hospital, Eindhoven, the Netherlands
- Martini Hospital, Groningen, the Netherlands
- Medisch Spectrum Twente, Enschede, the Netherlands
- OLVG, Amsterdam, the Netherlands
- St. Antonius Hospital, Nieuwegein/Utrecht, the Netherlands
- Maasstad Hospital, Rotterdam, the Netherlands (member since 2017, not included in this study)

[www.santeon.nl](http://www.santeon.nl)
